# Supplementary material for: Glia-neuron interactions underlie state transitions to generalized seizures
Source: PubMed Central journal article supplement (PMC6707163; doi:10.1038/s41467-019-11739-z), 2019-08-23
Supplement: 41467_2019_11739_MOESM1_ESM.pdf [file 41467_2019_11739_MOESM1_ESM.pdf]

Supplementary Information

**Glia-neuron interactions underlie state transitions to generalized seizures**

Diaz Verdugo, Myren-Svelstad *et al.*

## Supplementary Figures

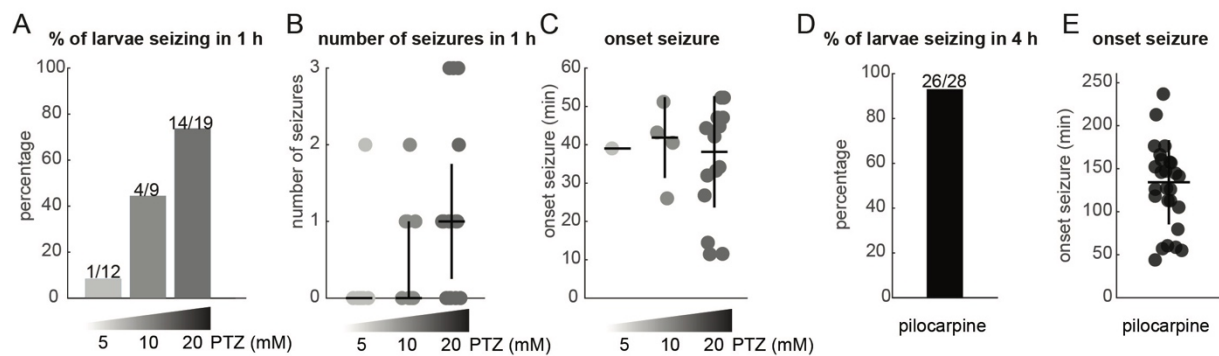

### Supplementary Fig. 1. 20 mM pentylenetetrazole (PTZ) induces generalized seizures more efficiently than 5 mM and 10 mM PTZ, and faster than 60 mM pilocarpine

5 days old *Tg(elavl3:GCaMP6s)* and *Tg(GFAP:Gal4)nw7;Tg(UAS:GCaMP6s)* animals were imaged under an epifluorescence or two-photon microscope following treatment with 5 mM, 10 mM or 20 mM PTZ for 1 h (A-C) or 60 mM pilocarpine for 4 h (D-E). The percentage of animals presenting at least one generalized seizure during 1 h PTZ (A) or 4 h pilocarpine (D) treatment, the number of generalized seizures during 1 h PTZ treatment (B) and the onset of the first generalized seizure are quantified for each PTZ concentration (C) and for 60 mM pilocarpine (E). Error bars represent median and interquartile range. Numbers of observations are included on top of the bar graphs.

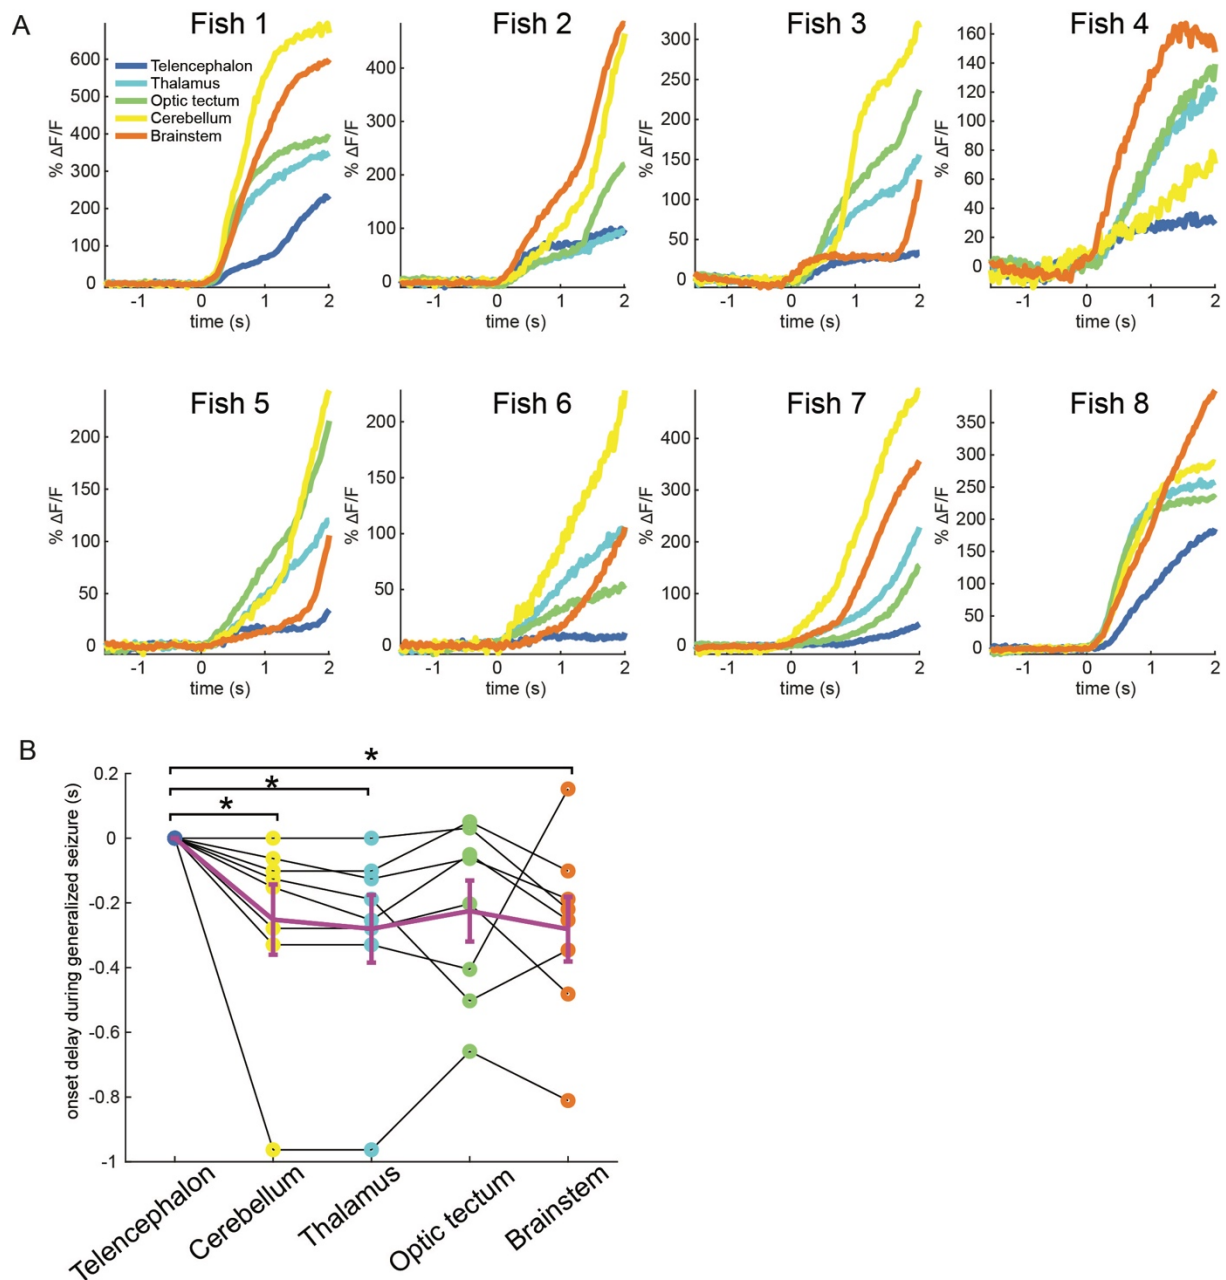

**Supplementary Fig. 2. Telencephalon is recruited significantly later than other brain regions during generalized seizures. Related to Fig. 2-3**

**A)** Average neural activity ( $\Delta F/F$ ) over time, organized by brain region in all recorded zebrafish with pentylenetetrazole (PTZ)-induced generalized seizures. The time period from 1 second before to 2 seconds after seizure onset is shown.

**B)** Telencephalon is recruited significantly later than most other brain regions (namely thalamus, cerebellum, and brainstem). Recruitment of telencephalon versus optic tectum does not show a significant difference.

\*:  $p < 0.05$ , Wilcoxon signed-rank test. Error bars (magenta) represent the s.e.m. of  $n=8$  fish.

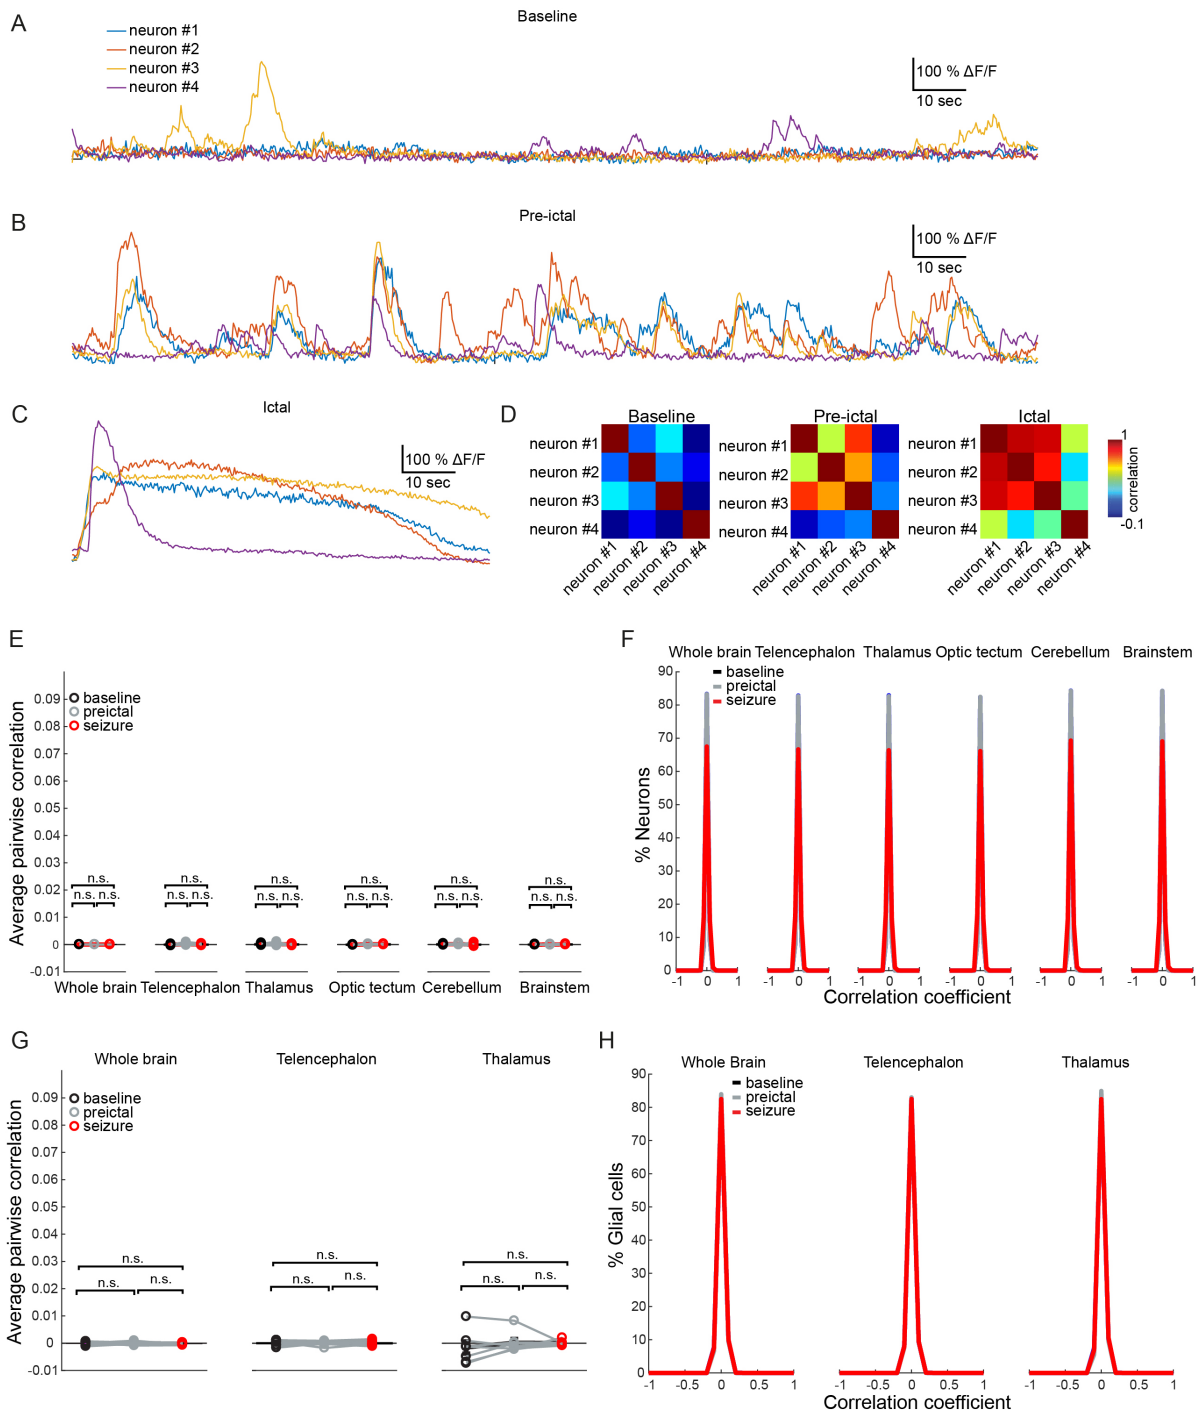

**Supplementary Fig. 3. Single-neuron dynamics change significantly through state transitions, and correlations within neural and glial cell populations are not due to amplitude effects. Related to Fig. 2-4**

**A-C)** Two photon calcium signals of four representative neurons during baseline, preictal, and seizure periods, in zebrafish larvae expressing *GCaMP6s* in all neurons, in response to 20 mM PTZ.

**D)** Correlations between pairs of neurons, which are presented in A-C. Note that neurons with highly synchronous activity (e.g. neurons 1 and 3) are highly correlated. Whereas neurons 2 and 4 exhibit asynchronous activity leading to low correlation coefficients.

**E-F)** Neural time series data (presented in Fig. 3B and 3E) were shuffled to show that neither average pairwise correlations nor correlation coefficients are due to amplitude effects.

**G-H)** Glial time series data (presented in Fig. 4G and 4I) were shuffled to show that neither average pairwise correlations nor correlation coefficients are due to amplitude effects.

n.s.= not significant ( $p > 0.05$ ), Wilcoxon signed-rank test.

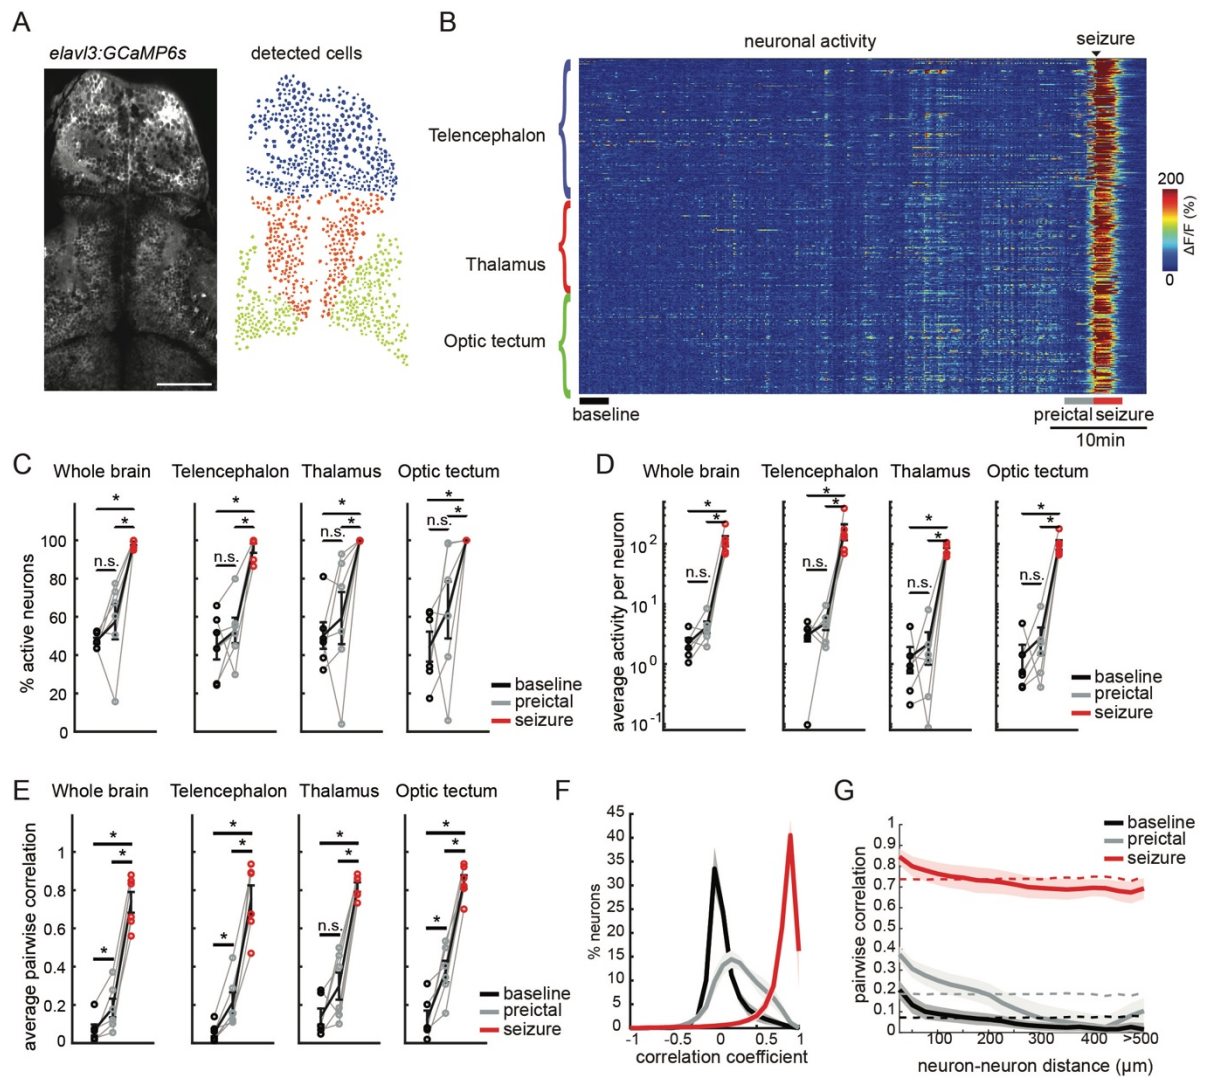

**Supplementary Fig. 4. Pilocarpine-induced seizures exhibit features similar to pentylenetetrazole (PTZ)-induced seizures, but the ictogenesis occurs less rapidly**

A) An optical section of a zebrafish larva expressing *GCaMP6s* in all neurons, obtained by two-photon microscopy, dorsal view (left). Individual neurons (right) in color-coded brain regions: telencephalon (blue), thalamus (red), and optic tectum (green). White bar reflects  $50 \mu\text{m}$ .

B) Activity of individual neurons ( $\Delta F/F$ ) over time, organized by brain region. Application of 60 mM pilocarpine was done at the beginning of the recording. Baseline is indicated for a time period preceding strongly correlated activity. Warmer colors indicate stronger activity.

C) Percentage of active neurons ( $>3\text{std}_{\text{baseline}}$ ) in the whole brain and per brain area during baseline (black), preictal (gray) and seizure (red) periods.

D) Average activity of the active neurons, defined by the area under the curve of the  $\Delta F/F$  trace, in the whole brain and per brain area.

E) Average pairwise Pearson's correlation across the whole brain, and within individual brain regions.

F) Histogram representing the distribution of all correlation coefficients between neurons from all animals.

G) Relation between pairwise Pearson's correlation of neural activity and the distance between each neuron pair. Dotted lines represent the results when neuronal locations are shuffled.  $n = 6$  fish. Shaded regions and error bars represent the s.e.m. (\* $p < 0.05$ , ns = not significant, Wilcoxon signed-rank test).

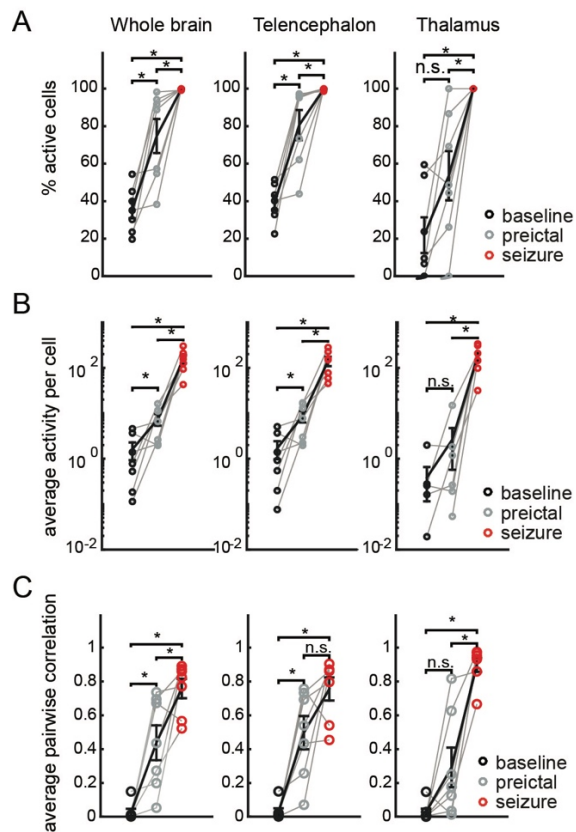

**Supplementary Fig. 5. Glia from specific brain regions are differentially recruited during epileptic activity**

Related to Fig. 4E-G. Percentage of active glial cells ( $>3\text{std}_{\text{baseline}}$ ) during baseline (black), preictal (gray) and seizure (red) periods (A), average activity of the active glial cells, defined by the area under the curve of the  $\Delta F/F$  trace (B) and average pairwise Pearson's correlation between glial cells (C) revealed that during the preictal period telencephalic glia are significantly more active and more correlated, when compared to baseline. This was not the case for thalamic glia (right). Each dot indicates one fish,  $n=7$  fish. Error bars (black) represent the s.e.m.

(\* $p < 0.05$ , ns= not significant Wilcoxon signed-rank test).

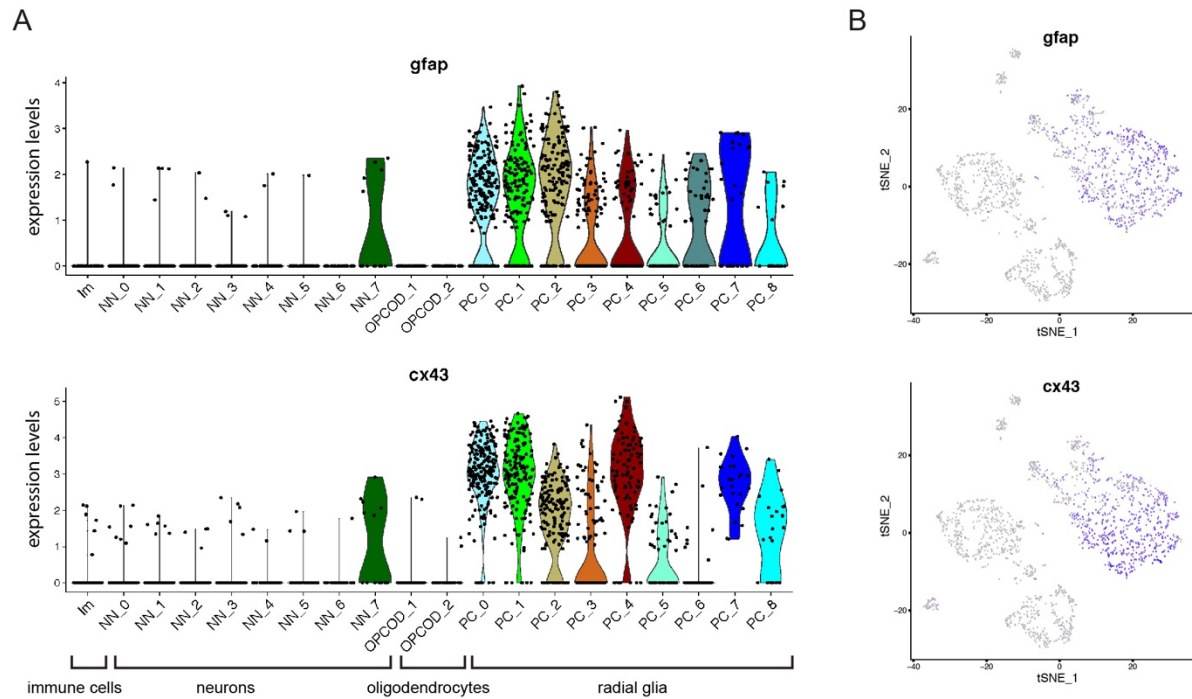

**Supplementary Fig. 6. Connexin 43 is highly expressed in zebrafish radial glial cells**

Single cell transcriptomics data of adult zebrafish telencephalon deposited in <https://kizillab.org/singlecell><sup>1</sup> reveal a strong overlap between *GFAP* expression marking glial cells and *connexin 43* in expression (A) and tSNE plots highlighting the overlap of *GFAP* expressing and *connexin 43* expressing cell clusters (B).





## Supplementary Tables

**Supplementary Table 1. Plasmids and zebrafish lines used in this study**

| Reagent or Resource                   | Source                                                                                                                  | Identifier                                                  |
|---------------------------------------|-------------------------------------------------------------------------------------------------------------------------|-------------------------------------------------------------|
| <b>Plasmid DNA</b>                    |                                                                                                                         |                                                             |
| <b><i>GFAP:Gal4</i></b>               | Ohshima lab                                                                                                             | <sup>2</sup>                                                |
| tol2 transposase pCS2FA plasmid       | <a href="http://tol2kit.genetics.utah.edu/index.php/Main_Page">http://tol2kit.genetics.utah.edu/index.php/Main_Page</a> | <sup>3</sup>                                                |
| <b>Zebrafish lines</b>                |                                                                                                                         |                                                             |
| <i>Tg(elavl3:GCaMP6s)</i>             | <sup>4</sup>                                                                                                            | ZFIN Cat# ZDB-ALT-141023-1,<br>RRID:ZFIN_ZDB-ALT-141023-1   |
| <i>Tg(GFAP:Gal4)nw7</i>               | This study                                                                                                              |                                                             |
| <i>Tg(5xUAS-hsp70l:GCaMP6s)</i>       | <sup>5</sup>                                                                                                            | ZFIN Cat# ZDB-ALT-170615-4                                  |
| <i>Tg(UAS:Cr.ChR2_H134R-mCherry)</i>  | <sup>6,7</sup>                                                                                                          | ZFIN Cat# ZDB-ALT-101227-5,<br>RRID:ZFIN_ZDB-ALT-101227-5   |
| <i>Et(-0.6hsp70l:Gal4-VP16)s1020t</i> | <sup>8</sup>                                                                                                            | ZFIN Cat# ZDB-ALT-070420-21,<br>RRID:ZFIN_ZDB-ALT-070420-21 |
| <i>Tg(elavl3:jRCaMP1a)</i>            | <sup>9</sup>                                                                                                            | ZFIN Cat# ZDB-ALT-160519-3,<br>RRID:ZFIN_ZDB-ALT-160519-3   |
| <i>Tg(gad1:GFP)</i>                   | <sup>10</sup>                                                                                                           | ZFIN Cat# ZDB-ALT-131127-6,<br>RRID:ZFIN_ZDB-ALT-131127-6   |
| <i>Tg(vglut2a:dsRed)</i>              | <sup>11</sup>                                                                                                           | ZFIN Cat# ZDB-ALT-100505-2,<br>RRID:ZFIN_ZDB-ALT-100505-2   |
| <i>Tg(gfap:Eco.GltL-cpEGFP)</i>       | <sup>12</sup>                                                                                                           | ZFIN Cat# ZDB-ALT-170404-12                                 |

**Supplementary Table 2. Chemicals, software, algorithms, and other resources used in this study**

| Reagent or Resource                                    | Source                                        | Identifier                              |
|--------------------------------------------------------|-----------------------------------------------|-----------------------------------------|
| <b>Chemicals</b>                                       |                                               |                                         |
| Pentylentetrazole (PTZ)                                | Sigma-Aldrich                                 | Cat# P6500                              |
| MS222 (Tricaine methanesulfonate)                      | Sigma-Aldrich                                 | Cat# E10521                             |
| Pilocarpine                                            | Tocris                                        | Cat # 0694                              |
| LMP Agarose                                            | Fisher Scientific                             | Cat# 16520100                           |
| $\alpha$ -bungarotoxin                                 | Thermo Fisher Scientific                      | Cat# B1601                              |
| Neurobiotin                                            | Vector labs                                   | Cat# SP-1125                            |
| PBS                                                    | Thermo Fisher Scientific                      | Cat# BR0014G                            |
| Streptavidin                                           | Vector labs                                   | Cat# SA-5000                            |
| <b>Software and Algorithms</b>                         |                                               |                                         |
| ImageJ/Fiji                                            | <a href="https://fiji.sc">https://fiji.sc</a> |                                         |
| Cell detection                                         | <sup>13</sup>                                 |                                         |
| Image alignment and processing                         | <sup>14</sup>                                 |                                         |
| <b>Other</b>                                           |                                               |                                         |
| Pressure injector                                      | Eppendorf                                     | Femtojet 4i                             |
| Confocal microscope<br>(20x plan NA 0.8 objective)     | Zeiss                                         | Examiner Z1                             |
| Stereomicroscope (20x Plan-<br>Apochromat, NA 0.8)     | Zeiss                                         | Axio Imager M1                          |
| Two-photon microscope                                  | Thorlabs                                      |                                         |
| Two-photon microscope                                  | Scientifica                                   |                                         |
| Epifluorescence microscope                             | Olympus Corporation                           | Olympus BX51<br>fluorescence microscope |
| MultiClamp 700B amplifier, Digidata<br>1440A digitizer | Axon instruments                              |                                         |
| EMCCD camera                                           | Axon instruments                              |                                         |
| Sutter Laser puller                                    | Hamamatsu Photonics                           |                                         |
|                                                        | Sutter                                        | Model P-200                             |

## Supplementary References

- 1 Cosacak, M. I. *et al.* Single-Cell Transcriptomics Analyses of Neural Stem Cell Heterogeneity and Contextual Plasticity in a Zebrafish Brain Model of Amyloid Toxicity. *Cell Rep* **27**, 1307-1318.e1303, doi:10.1016/j.celrep.2019.03.090 (2019).
- 2 Shimizu, Y., Ito, Y., Tanaka, H. & Ohshima, T. Radial glial cell-specific ablation in the adult Zebrafish brain. *Genesis* **53**, 431-439, doi:10.1002/dvg.22865 (2015).
- 3 Kwan, K. M. *et al.* The Tol2kit: a multisite gateway-based construction kit for Tol2 transposon transgenesis constructs. *Dev Dyn* **236**, 3088-3099, doi:10.1002/dvdy.21343 (2007).
- 4 Vladimirov, N. *et al.* Light-sheet functional imaging in fictively behaving zebrafish. *Nature methods* **11**, 883-884, doi:10.1038/nmeth.3040 (2014).
- 5 Muto, A. *et al.* Activation of the hypothalamic feeding centre upon visual prey detection. *Nat Commun* **8**, 15029, doi:10.1038/ncomms15029 (2017).
- 6 Hubbard, Jeffrey M. *et al.* Intraspinal Sensory Neurons Provide Powerful Inhibition to Motor Circuits Ensuring Postural Control during Locomotion. *Current Biology* **26**, 2841-2853, doi:10.1016/j.cub.2016.08.026 (2016).
- 7 Schoonheim, P. J., Arrenberg, A. B., Del Bene, F. & Baier, H. Optogenetic localization and genetic perturbation of saccade-generating neurons in zebrafish. *J Neurosci* **30**, 7111-7120, doi:10.1523/JNEUROSCI.5193-09.2010 (2010).
- 8 Scott, E. K. & Baier, H. The cellular architecture of the larval zebrafish tectum, as revealed by gal4 enhancer trap lines. *Frontiers in neural circuits* **3**, 13-13, doi:10.3389/neuro.04.013.2009 (2009).
- 9 Dunn, T. W. *et al.* Brain-wide mapping of neural activity controlling zebrafish exploratory locomotion. *Elife* **5**, e12741, doi:10.7554/eLife.12741 (2016).
- 10 Satou, C. *et al.* Transgenic tools to characterize neuronal properties of discrete populations of zebrafish neurons. *Development* **140**, 3927-3931, doi:10.1242/dev.099531 (2013).
- 11 Miyasaka, N. *et al.* From the olfactory bulb to higher brain centers: genetic visualization of secondary olfactory pathways in zebrafish. *J Neurosci* **29**, 4756-4767, doi:10.1523/JNEUROSCI.0118-09.2009 (2009).
- 12 MacDonald, R. B., Kashikar, N. D., Lagnado, L. & Harris, W. A. A Novel Tool to Measure Extracellular Glutamate in the Zebrafish Nervous System In Vivo. *Zebrafish* **14**, 284-286, doi:10.1089/zeb.2016.1385 (2017).
- 13 Ohki, K., Chung, S., Ch'ng, Y. H., Kara, P. & Reid, R. C. Functional imaging with cellular resolution reveals precise micro-architecture in visual cortex. *Nature* **433**, 597, doi:10.1038/nature03274 (2005).
- 14 Reiten, I. *et al.* Motile-Cilia-Mediated Flow Improves Sensitivity and Temporal Resolution of Olfactory Computations. *Current Biology* **27**, 166-174, doi:10.1016/j.cub.2016.11.036 (2017).
